# Supplementary material for: Highly uniform and vertically aligned SnO2nanochannel arrays for photovoltaic applications
Source: Royal Society of Chemistry journal article supplement (doi:10.1039/c5nr00202h), 2015-01-01
Supplement: c5nr00202h1.pdf [file c5nr00202h1.pdf]

## Electronic supplementary information

# Highly uniform and vertically aligned SnO<sub>2</sub> nanochannel arrays for photovoltaic applications

Jae-Yup Kim,<sup>‡a</sup> Jin Soo Kang,<sup>‡bc</sup> Junyoung Shin,<sup>c</sup> Jin Kim,<sup>bc</sup> Seung-Joo Han,<sup>d</sup> Jongwoo Park,<sup>a</sup>  
Yo-Sep Min,<sup>d</sup> Min Jae Ko<sup>\*aef</sup> and Yung-Eun Sung<sup>\*bc</sup>

<sup>a</sup>Photo-electronic Hybrids Research Center, Korea Institute of Science and Technology (KIST), Seoul 136-791, Republic of Korea.

<sup>b</sup>Center for Nanoparticle Research, Institute for Basic Science (IBS), Seoul 151-742, Republic of Korea.

<sup>c</sup>School of Chemical and Biological Engineering, Seoul National University, Seoul 151-742, Republic of Korea.

<sup>d</sup>Department of Chemical Engineering, Konkuk University, Seoul, 143-701, Republic of Korea

<sup>e</sup>Green School, Korea University, Seoul 136-701, Republic of Korea.

<sup>f</sup>KU-KIST Graduate School of Converging Science and Technology, Korea University, Seoul 136-701, Republic of Korea.

<sup>‡</sup>These authors contributed equally to this work.

### \*CORRESPONDING AUTHORS

Yung-Eun Sung

Tel: +82-2-880-1889; fax: +82-2-888-1604; e-mail address: ysung@snu.ac.kr

Min Jae Ko

Tel: +82-2-958-5518; fax: +82-2-958-6649; e-mail address: mjko@kist.re.kr

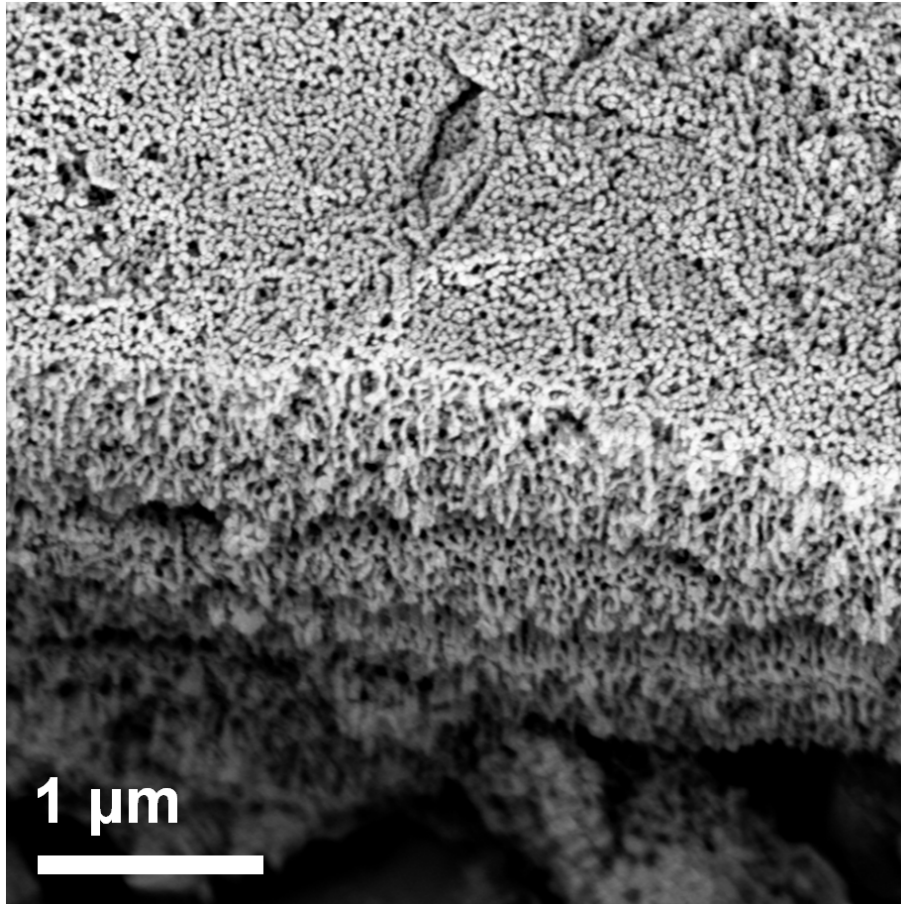

**Fig. S1.** FE-SEM image of annealed SnO<sub>2</sub> nanochannel arrays prepared by the conventional anodic oxidation process (This image was obtained after tilting the edge side of prepared sample during the FE-SEM analysis).

**Table S1.** Summary of  $J$ - $V$  characteristics of the SnO<sub>2</sub> nanochannel electrodes for different anodic oxidation times.

| anodic oxidation time (sec) | thickness of nanochannel ( $\mu\text{m}$ ) | $J_{\text{sc}}$ ( $\text{mA}/\text{cm}^2$ ) | $V_{\text{oc}}$ (mV) | $FF$ (%) | $\eta$ (%) |
|-----------------------------|--------------------------------------------|---------------------------------------------|----------------------|----------|------------|
| 210                         | 4.0                                        | 3.92                                        | 535                  | 33.38    | 0.70       |
|                             |                                            | 3.49                                        | 550                  | 34.38    | 0.66       |
|                             |                                            | 3.10                                        | 565                  | 34.83    | 0.61       |
| 270                         | 6.0                                        | 5.73                                        | 545                  | 31.06    | 0.97       |
|                             |                                            | 5.64                                        | 555                  | 31.31    | 0.98       |
|                             |                                            | 4.99                                        | 575                  | 36.59    | 1.05       |
| 330                         | 7.0                                        | 6.81                                        | 560                  | 34.09    | 1.30       |
|                             |                                            | 6.85                                        | 550                  | 33.18    | 1.25       |
|                             |                                            | 6.51                                        | 570                  | 35.30    | 1.31       |
| 390                         | 6.4                                        | 5.65                                        | 550                  | 35.40    | 1.10       |
|                             |                                            | 5.99                                        | 560                  | 29.22    | 0.98       |
|                             |                                            | 5.05                                        | 560                  | 36.78    | 1.04       |

**Table S2.** Summary of the  $J$ - $V$  characteristics of the SnO<sub>2</sub>/TiO<sub>2</sub> nanochannel electrodes for different number of TiO<sub>2</sub> atomic layer deposition cycles.

| ALD cycles  | $J_{sc}$<br>(mA/cm <sup>2</sup> ) | $V_{oc}$<br>(mV) | $FF$<br>(%) | $\eta$<br>(%) |
|-------------|-----------------------------------|------------------|-------------|---------------|
| 0 cycle-1   | 6.81                              | 560              | 34.09       | 1.30          |
| 0 cycle-2   | 6.85                              | 550              | 33.18       | 1.25          |
| 0 cycle-3   | 6.51                              | 570              | 35.30       | 1.31          |
| 3 cycles-1  | 5.15                              | 510              | 32.74       | 0.86          |
| 3 cycles-2  | 5.84                              | 485              | 35.31       | 1.00          |
| 3 cycles-3  | 5.00                              | 490              | 34.69       | 0.85          |
| 6 cycles-1  | 4.59                              | 515              | 37.65       | 0.89          |
| 6 cycles-2  | 4.78                              | 490              | 33.73       | 0.79          |
| 6 cycles-3  | 5.66                              | 495              | 33.19       | 0.93          |
| 15 cycles-1 | 8.55                              | 570              | 32.83       | 1.60          |
| 15 cycles-2 | 7.90                              | 545              | 34.37       | 1.48          |
| 15 cycles-3 | 7.68                              | 565              | 35.26       | 1.53          |
| 30 cycles-1 | 6.45                              | 605              | 32.80       | 1.28          |
| 30 cycles-2 | 6.45                              | 590              | 32.85       | 1.25          |
| 30 cycles-3 | 6.49                              | 590              | 34.21       | 1.31          |
